# Supplementary material for: Anthropogenic and volcanic point source SO 2 emissions derived from TROPOMI on board Sentinel-5 Precursor: first results
Source: Copernicus journal article supplement (doi:10.5194/acp-20-5591-2020), 2020-05-13
Supplement: Supplementary file 1 [file Tropomi_Catalogue_Paper_Suplement.xls]

## Sheet: Read Me
LATITUDE	Latitude in deg., negative for the Southern Hemisphere
LONGITUDE	Longitude in deg., negative for the Western Hemisphere
ELEVATION	SIte elevation above sea level in m
TYPE	Soruce type
NAME	Short name for the site identifivcation
COUNTRY	The country of the site location
COMMENT	Additional information about the site. Note that the attribution of the sources was done based on our best knowledge and may not always be correct.
AMF	AMF values used to adjust emissions based on the site elevation, albedo, etc.
EMISSIONS (kt[SO2]/yr) for the year	Estimated emissions for the period from April 2018 to March 2019
UNCERTAINTY (one standard deviation of the estimated emissions)	One standard deviation of the estimated emissions
RATIOS OF EMISSIONS TO THEIR FITTING UNCERTAINTIES	The ratio of estimated emission to the standard deviation of the estimate

## Sheet: Data
		ELEVATION						TROPOMI			OMI			OMPS
LATITUDE	LONGITUDE	(m)	TYPE	NAME	COUNTRY	COMMENT	AMF	EMISSIONS	UNCERTAINTIES	RATIOS	EMISSIONS	UNCERTAINTIES	RATIOS	EMISSIONS	UNCERTAINTIES	RATIOS
69.3603	88.1332	86	Smelter	Norilsk	Russia	Norilsk smelters	0.26026	1635.55	97.1807	16.83	1806.95	117.669	15.3562	1541.88	109.731	14.0515
58.3466	60.0739	231	Smelter	Krasnouralsk	Russia	Copper smelter. Other sources within 50 km	0.31515	153.441	12.8808	11.9123	86.4665	22.0495	3.92148	127.898	19.6542	6.50741
57.4149	60.0815	253	Smelter	Kirovograd	Russia	Kirovograd smelter	0.31922	111.938	11.4352	9.78888	98.1875	23.0098	4.2672	110.98	19.5714	5.6705
57.1118	61.7033	200	Power Plant	Reftinskaya	Russia	Reftinskaya power plant	0.31658	137.252	13.0957	10.4806	102.354	23.1847	4.41474	44.2229	18.2502	2.42314
57.0405	-111.619	314	Oil and Gas	Mildred Lake	Canada	Oil Sands mines with upgraders	0.33484	32.6981	7.26349	4.50171	25.5327	20.313	1.25696	15.4375	15.1123	1.02152
56.6441	161.343	3283	Volcano	Shiveluch	Russia	Shiveluch Volcano. Possible interference from other volcanic sources	0.93324	225.011	14.3914	15.6351	235.646	22.5009	10.4727	163.311	20.4798	7.97425
56.17	-159.38	2507	Volcano	Veniaminof	USA	Veniaminof	0.73502	188.637	14.6595	12.8679	107.298	27.4758	3.90517	95.4305	31.6246	3.0176
56.057	160.638	4835	Volcano	Kliuchevskoi	Russia	Kliuchevskoi volacno	1.21308	104.78	7.65993	13.6789	109.282	14.2488	7.66955	102.517	16.0422	6.39046
55.7138	-97.8561	214	Smelter	Thompson	Canada	Thompson nickel smelter	0.32428	44.8754	8.3825	5.35345	56.9355	22.2231	2.56199	20.8448	16.3576	1.27432
55.4674	60.204	336	Smelter	Karabash	Russia	Karabash copper smelter	0.34793	78.8424	10.6871	7.37731	101.971	22.1887	4.59563	84.9227	24.3734	3.48423
54.756	-163.97	2857	Volcano	Shishaldin	USA	Shishaldin	0.83105	45.5208	7.69181	5.91809	16.4292	17.762	0.924967	0	14.0264	0
54.5636	39.7626	164	Oil and Gas	Ryazan	Russia	Ryazan oil refinery. Other sources in the area.	0.31966	92.4368	9.39854	9.83523	105.347	23.0227	4.57578	40.0641	16.7729	2.38862
54.05	159.45	1536	Volcano	Karymsky	Russia	Karymsky volcano	0.53317	123.558	10.8502	11.3876	166.169	23.2899	7.1348	123.648	23.6785	5.22197
53.2543	158.831	2741	Volcano	Avachinsky	Russia		0.79365	64.0806	7.26667	8.81843	105.546	18.1909	5.80211	70.3658	16.6833	4.21774
52.5573	39.5996	120	Power Plant	Lipetsk	Russia	Lipetsk, multiple sources related to iron production	0.31702	56.5202	7.94294	7.11577	65.1547	21.336	3.05375	34.2578	17.6857	1.93703
52.5381	103.954	419	Power Plant	Angarsk	Russia	Multiple coal power plants. The signal is much stronger in winter	0.36949	63.8337	6.7125	9.50967	70.7317	15.053	4.69884	35.6427	10.8735	3.27795
52.453	158.195	2322	Volcano	Mutnovsky	Russia	Mutnovsky volcano	0.7161	196.983	13.833	14.2401	131.534	19.7622	6.65583	156.7	21.5913	7.25758
52.1179	76.8723	115	Power Plant	Pavlodar	Kazakhstan	Three power plants within 20 km	0.36454	152.651	11.7372	13.0057	154.351	21.8585	7.06137	77.4242	17.7603	4.35939
52.0242	75.4758	131	Power Plant	Ekibastuz	Kazakhstan	Coal power plants. The signal is stronger in winter	0.3652	88.4641	9.2418	9.57217	124.321	24.2538	5.12585	98.1902	20.3164	4.83304
51.8726	54.76	196	Oil and Gas	Orenburg	Russia	Gas refinery, power plant within 20 km	0.33792	115.383	9.93903	11.609	116.114	19.0922	6.08176	112.937	16.3452	6.90951
51.79	-178.794	1573	Volcano	Gareloi	USA	Gareloi	0.82643	52.1985	10.0765	5.18023	59.9073	19.2189	3.1171	65.3285	21.1772	3.08486
51.2652	19.3241	195	Power Plant	Belchatow	Poland	Coal power plant	0.33	52.2654	7.68803	6.79829	76.3492	18.198	4.19546	39.5244	14.5788	2.71109
51.0578	6.57729	60	Power Plant	Frimmersdorf	Germany	Frimmersdorf power plant, other sources?	0.29117	52.517	7.94398	6.61092	17.4017	19.5428	0.890439	0.65096	17.1905	0.0378673
50.325	155.458	1816	Volcano	Chikurachki	Russia	Chikurachki	0.64152	272.707	17.9663	15.1788	279.264	29.8811	9.34586	220.976	25.4841	8.67112
50.04	73.023	518	Power Plant	Temirtau	Kazakhstan	Coal power plant and steel mill. The signal is stronger in winter.	0.42185	97.1057	8.11741	11.9626	129.471	17.7233	7.30511	66.0806	14.0626	4.69904
49.9847	82.6162	293	Power Plant	Ust-Kamenogors	Kazakhstan	Coal power plant	0.34309	57.743	6.83805	8.44437	40.2628	16.1092	2.49937	49.4033	14.3688	3.43824
49.5848	36.5225	121	Power Plant	Zmiivska	Ukraine	Zmiivska power plant	0.30624	87.4082	8.97908	9.73464	57.8993	17.562	3.29686	100.823	16.1134	6.25712
49.2105	24.6629	227	Power Plant	Burshtynska	Ukraine	Coal power plant	0.30734	67.1574	7.65689	8.77085	111.366	18.5568	6.00135	50.1076	13.7673	3.63962
48.7489	39.2613	54	Power Plant	Luhansk	Ukraine	Luhansk coal power plant	0.29777	52.8405	7.826	6.75192	46.4027	17.7931	2.60791	35.7061	15.375	2.32235
48.7055	29.2198	196	Power Plant	Ladyzhinska	Ukraine	Ladyzhinska thermal power plant	0.32021	47.2292	7.26352	6.50225	68.6945	17.3397	3.96168	41.0875	14.6782	2.79922
48.4646	38.2062	202	Power Plant	Vuglegirska	Ukraine	Vuglegirska coal power plant. Combined with Zuevskaya power plant 50 km south and Slavyanskay power plant 50 km north	0.308	174.206	12.5584	13.8717	218.169	21.0469	10.3659	126.198	16.7236	7.5461
48.3075	57.3951	165	Oil and Gas	Zhanazhol	Kazakhstan	Zhanazhol crude oil has a high mercaptan and hydrogen sulfide content	0.39611	79.8643	7.23463	11.0392	62.9473	12.6172	4.98902	58.8654	12.353	4.76526
48.08	153.21	1200	Volcano	Sarychev	Russia		0.51502	48.9825	12.851	3.81158	16.4512	31.4058	0.523829	21.4288	26.1374	0.819851
47.99	37.24	123	Power Plant	Kurakhovskaya	Ukraine	Kurakhovskaya power plant	0.29898	209.106	14.2333	14.6913	179.167	19.0786	9.39099	147.583	18.0382	8.18169
47.7747	67.7251	344	Smelter	Zhezkazgan	Kazakhstan	Copper smelter. Also power plants in the area	0.43285	72.1458	6.60933	10.9158	92.7111	12.6732	7.31555	56.3575	10.7435	5.24574
47.5407	33.6579	99	Power Plant	Kryvorizka	Ukraine		0.30184	54.2591	7.72612	7.02282	52.6337	16.0038	3.28882	23.6678	13.6741	1.73085
47.5061	34.629	44	Power Plant	Zaporizhya	Ukraine	Power plant and steel plant	0.29546	75.3606	8.88262	8.48405	99.7798	17.6679	5.64753	71.9436	15.4884	4.64498
47.4002	40.2314	10	Power Plant	Novocherkassk	Russia		0.28985	104.964	9.60753	10.9252	99.7791	18.791	5.30993	60.1618	18.381	3.27305
46.8322	74.9448	357	Smelter	Balqash	Kazakhstan	A large copper smelter	0.46673	116.125	7.98317	14.5463	86.6253	10.8763	7.96457	116.951	11.7399	9.9619
46.7708	48.1179	-19	Oil and Gas	Astrakhan	Russia	Gas refinery, power plant within 20 km	0.33132	138.229	10.3857	13.3095	115.119	17.3594	6.63152	78.0257	14.7277	5.29787
45.387	148.843	1125	Volcano	Medvezhia	Russia	Medvezhia	0.48851	55.7139	12.4551	4.47317	81.8458	22.4229	3.6501	76.4656	22.7464	3.36166
44.7306	21.2115	74	Power Plant	Kostolac	Serbia	Coal power plant.	0.29447	97.9118	8.47195	11.5572	128.142	16.2356	7.89265	95.634	15.6582	6.10759
44.6715	20.1574	73	Power Plant	Nikola Tesla	Serbia	Coal power plant.	0.29766	206.409	13.7537	15.0076	217.693	19.9518	10.9109	214.31	21.669	9.89017
44.5204	18.604	224	Power Plant	Tuzla	Bosnia and Herzegovina	Tuzla, Ugljevik, and other coal power plants	0.30448	196.464	13.2973	14.7747	213.703	19.25	11.1015	203.646	20.5273	9.92074
44.3261	86.1463	473	Power Plant	Manasi	China	Manasi coal power plant, other power plants in the area	0.52151	33.7069	3.88781	8.66989	39.9596	7.12256	5.61029	24.1477	6.18509	3.90417
44.0893	18.1139	400	Power Plant	Kakanj	Bosnia and Herzegovina		0.32076	36.1286	6.73633	5.36324	15.4792	13.2009	1.17259	0	14.8852	0
43.416	142.69	2077	Volcano	Tokachi	Japan	Tokachi	0.63767	156.847	14.03	11.1794	142.545	26.1431	5.45249	92.9203	23.3693	3.97618
42.7961	-82.4697	184	Power Plant	Lambton	Canada	Multiple coal power plants near Sarnia	0.32912	25.9451	7.19447	3.60626	34.4695	15.9227	2.1648	26.0245	16.6121	1.5666
42.3024	119.326	470	Power Plant	Yuanbaoshan	China		0.47036	30.0007	5.55516	5.40051	0	9.95968	0	16.017	9.57321	1.67311
42.2851	23.0354	514	Power Plant	Bobov Dol	Bulgaria	Bobov Dol power station	0.36025	53.6186	5.95907	8.99783	66.4135	12.7299	5.21714	38.6322	11.028	3.50309
42.1532	26	111	Power Plant	Marica	Bulgaria	Three power plants within 20 km	0.28974	255.942	16.3842	15.6213	171.803	16.8802	10.1778	151.957	15.2134	9.98835
41.7315	123.194	30	Power Plant	Shenyang	China	Multiple industrial sources	0.31493	62.1704	7.868	7.90169	28.4774	14.2234	2.00214	47.1562	15.6671	3.00988
41.1353	123.096	50	Power Plant	Liaoyang	China	power plant, other sources near Liaoyang	0.3014	57.8492	8.08952	7.15113	79.2646	16.1279	4.91474	69.7957	16.8617	4.13931
41.0572	21.4829	600	Power Plant	Novatsi	Macedonia (FYROM)	Power plant near Novatsi	0.40172	50.9086	5.6091	9.07609	25.6667	9.79492	2.62041	35.7375	10.0874	3.54278
41.0516	120.983	40	Oil and Gas	Jinzhou	China	CNCP (PetroChina) Jinzhou Petrochemical Refinery	0.33506	102.927	9.20584	11.1806	52.694	14.4708	3.64141	75.016	14.9054	5.0328
40.8572	69.5278	500	Smelter	Almalyk	Uzbekistan	Almalyk Copper smelter	0.46618	122.978	8.01496	15.3435	121.641	9.89815	12.2893	97.789	9.22249	10.6033
40.67	108.74	1033	Power Plant	Chagan Hada	China	Urals Plant	0.72501	19.9265	3.39661	5.86657	25.1733	7.60538	3.30993	14.5099	6.93361	2.09268
40.66	109.76	1017	Power Plant	Baotou	China	Iron factory near Baotou.	0.67309	63.6018	5.02544	12.656	37.5827	7.13858	5.26473	35.8475	6.88535	5.20635
40.0966	31.6949	554	Power Plant	Cayirhan	Turkey		0.48268	88.0098	6.45375	13.637	29.783	7.2435	4.11169	45.563	7.57852	6.01213
40.0309	113.292	1041	Power Plant	Datong	China	Multiple coal power plants in the area	0.60192	36.8714	4.75824	7.74897	18.5233	8.84441	2.09435	16.2099	7.83573	2.06872
39.8066	98.2982	1623	Power Plant	Jiayuguan	China	Power plant, other sources near Jiayuguan	0.96635	19.1463	2.59631	7.37442	20.5393	5.05074	4.06659	20.6059	5.16857	3.98678
39.7728	118.273	60	Power Plant	Douhe	China	Douhe Coal power plant	0.32043	189.44	13.3381	14.2029	164.199	17.88	9.18341	161.322	18.8407	8.5624
39.5719	29.8781	1155	Power Plant	Seyitomer	Turkey	Seyitomer and Tuncbilek coal power plant located 36 km apart	0.52426	133.495	9.27664	14.3905	104.857	11.8406	8.8557	129.918	13.3462	9.73445
39.4361	106.723	1125	Power Plant	Shizuishan	China	Multiple coal power plant within about 20 km area near Shizuishan, Ningxia. There are other power plant within 40 km	0.78991	100.212	6.42253	15.6032	92.8943	7.96547	11.6621	74.9528	6.8233	10.9848
39.3629	112.533	1075	Power Plant	Shuozhou	China	Power plant near Shuozhou	0.59906	39.8728	4.77289	8.35402	16.2236	8.42907	1.92472	31.0931	7.80005	3.98627
39.186	65.292	304	Oil and Gas	Mubarek	Uzbekistan	Mubarec gap processing plant, other oil and gas industrial sources	0.47784	236.108	14.3334	16.4726	216.509	15.5356	13.9363	185.374	14.5178	12.7688
39.0757	37.2969	1596	Power Plant	Kangal	Turkey	Kangal coal power plant	0.73524	108.432	7.36279	14.7271	74.4635	9.06506	8.21434	59.4125	10.3187	5.75776
39.0536	117.411	5	Power Plant	Junliangcheng	China	Junliangcheng coal power plant	0.33275	40.6168	6.93322	5.85828	57.2431	15.2178	3.76158	0	13.7861	0
39.0147	121.724	10	Power Plant	Dalian	China	Huaneng Dalian coal power plant	0.21307	64.0318	10.5771	6.05383	43.471	21.1535	2.05503	0	21.3396	0
38.92	-82.1271	177	Power Plant	Kyger Creek	USA	Kyger Creek and Gavin coal power plant located 2 km apart. Other coal power plant in the area.	0.31284	51.923	6.78683	7.65056	54.1685	12.6837	4.27073	35.1111	12.3803	2.83604
38.8033	26.9397	20	Oil and Gas	Aliaga Kardemir	Turkey	Aliaga Kardemir refinery and power plant	0.25091	41.0059	7.31792	5.60349	57.2138	16.1853	3.53492	75.0255	18.5936	4.03501
38.7878	15.2148	870	Volcano	Stromboli	Italy		0.40249	61.2046	6.12634	9.99041	15.4459	11.0784	1.39423	44.2096	15.9012	2.78026
38.3451	36.98	1207	Power Plant	Afsin Elbistan	Turkey	Two Afsin Elbistan coal power plants 4 km apart. Kangal coal power plant located 80 km north.	0.62799	255.638	15.5155	16.4763	247.985	17.9285	13.8319	227.271	17.9529	12.6593
38.0572	114.196	250	Power Plant	Shangan	China	Huaneng Shang'an coal power plant	0.40678	76.6063	6.76282	11.3276	85.5746	11.5356	7.4183	43.6263	10.2333	4.26318
37.7808	112.48	800	Power Plant	Taiyuan	China	Taiyuan power plant	0.5115	59.04	5.3775	10.9791	50.3744	8.95833	5.62319	40.3459	9.0378	4.46413
37.734	15.004	2711	Volcano	Mt. Etna	Italy	Mount Etna volcano	0.82401	865.364	51.2624	16.8811	846.402	52.1866	16.2187	877.555	57.5619	15.2454
37.0344	27.9007	12	Power Plant	Kemerkoy	Turkey	Kemerkoy, Yenikoy, and Yatagan coal power plant within 40 km	0.27973	232.749	15.0166	15.4994	324.309	24.0896	13.4626	240.632	20.2381	11.89
36.8375	53.2592	1	Power Plant	Neka	Iran	Neka power plant	0.29568	29.4654	5.66412	5.20211	45.4907	12.4926	3.64141	47.4113	10.6694	4.44366
36.7604	118.056	60	Power Plant	Zibo	China	Power plant near Zibo. Another power plant 15 km North-East	0.33231	107.933	8.56272	12.605	114.138	14.8178	7.70274	122	14.3677	8.4913
36.7317	114.095	300	Power Plant	Wuan	China	Industrial region near Wuan	0.36124	124.331	9.29242	13.3798	141.61	14.4622	9.79173	85.5436	13.4259	6.37153
36.5523	104.205	1702	Smelter	Baiyin	China	Baiyin copper smelter, other sources in the area	0.88924	43.5114	3.34688	13.0006	43.1697	4.91039	8.79152	33.6079	4.60871	7.29225
36.4702	115.912	32	Power Plant	Liaocheng	China	Liaocheng Powerplant	0.32769	51.854	7.03186	7.37416	25.4472	13.5747	1.87461	37.6453	13.1816	2.85589
36.4672	60.8471	469	Oil and Gas	Khangiran	Iran	Shahid Hashemmiejad (Khangiran) Gas refinery	0.60346	151.685	9.37042	16.1877	188.857	13.2087	14.298	164.656	12.6845	12.9808
36.4462	59.414	1110	Power Plant	Toos	Iran		0.69322	14.1648	2.77226	5.10948	13.9759	6.12394	2.28217	0	7.13345	0
36.13	117.68	215	Power Plant	Laicheng	China	Laicheng coal power plant other sources	0.33462	108.516	8.66655	12.5213	71.2383	12.8445	5.54623	86.2805	13.9462	6.18667
35.64	51.43	1137	Power Plant	Tehran	Iran	Besat Thermal power plant Iran (oil). Oil refinery 14 km south. Other sources are possible.	0.74899	18.9534	2.9027	6.52956	16.916	5.72828	2.95307	8.70311	6.22009	1.39919
35.5973	110.556	420	Power Plant	Hejin	China	Two power plants, other sources near Hejin	0.45375	60.2955	5.57307	10.8191	77.6176	9.42354	8.23657	70.6344	10.0365	7.03776
35.53	44.34	317	Oil and Gas	Kirkuk	Iraq	Kirkuk oil wells	0.62007	87.9178	5.81626	15.1159	78.8437	7.54134	10.4549	41.1332	6.92833	5.93695
35.3236	116.928	60	Power Plant	Zouxian	China	Zouxian Coal power plant	0.31438	36.3842	6.71032	5.42212	43.1713	14.392	2.99967	0	12.9967	0
35.1508	109.932	675	Power Plant	Chengcheng	China	Power plant near Chengcheng	0.49258	25.2571	4.10146	6.15807	11.1339	6.94801	1.60245	10.3983	7.41917	1.40155
34.959	36.661	404	Power Plant	Al-Zara	Syria	Al-Zara Thermal power plant. Meharedeh power plant in 35 km north.	0.52129	26.4245	3.51343	7.521	24.9291	7.38712	3.37467	12.4536	7.08101	1.75874
34.9191	127.769	1	Power Plant	Gwangyang	South Korea	Steel plant	0.29535	69.527	7.5347	9.22758	69.4034	14.1842	4.89302	45.6598	13.5609	3.36702
34.0029	49.4879	1900	Oil and Gas	Arak	Iran	Arak refinery and power plant	0.90893	29.4519	2.64451	11.137	52.1517	5.81291	8.97169	37.0279	5.26438	7.03367
33.9619	35.6055	35	Power Plant	Zouk	Lebanon	Zouk Thermal power plant Lebanon	0.33715	21.8987	5.03492	4.34937	25.8554	10.655	2.42659	6.73564	9.75679	0.690353
33.49	44.35	37	Oil and Gas	Bagdad	Iraq	Multiple power plants and oil fields in the area	0.59444	114.105	7.20839	15.8294	128.151	10.4344	12.2816	79.2716	8.88884	8.91811
33.1048	-8.6367	10	Power Plant	Jorf Lasfar	Morocco	Jorf Lasfar (JLEC) Thermal power plant	0.28622	66.5698	6.61565	10.0625	107.533	14.1147	7.6185	63.1474	13.0462	4.84028
32.881	131.106	1181	Volcano	Aso	Japan		0.46761	185.416	13.2101	14.0359	212.785	22.1177	9.62054	221.503	24.8953	8.89738
32.787	51.5109	1657	Oil and Gas	Isfahan	Iran	Isfahan oil refinery; Power plant 20 km south.	0.92015	14.4335	1.86677	7.73181	36.5592	4.19044	8.72444	22.9466	3.71813	6.17155
32.5	47.21	98	Oil and Gas	Dehloran	Iran	Oil fields. Another source in the area is Khuzestan, Iran; other sources	0.56045	178.21	10.8517	16.4223	136.553	10.6274	12.8491	96.4556	10.1596	9.49407
32.2593	-94.5714	97	Power Plant	Martin Lake	USA	US Source #33, 77 kT in 2005.	0.28809	67.6029	8.01012	8.43969	77.7434	13.4383	5.7852	80.3261	16.8601	4.76426
32.2216	-9.24906	15	Power Plant	Safi	Morocco	Sidi Ghouza Industrial ?	0.30217	41.4172	5.75381	7.19821	5.20911	11.0037	0.473397	29.3051	10.669	2.74674
31.585	130.657	639	Volcano	Sakura-jima	Japan	Sakura-jima, one of Japan's most active volcanoes	0.3916	540.509	32.6101	16.5749	507.477	34.8564	14.5591	440.052	34.5331	12.7429
31.35	121.6	13	Power Plant	Shanghai	China	Multiple power plants near Shanghai	0.3839	48.6772	6.05669	8.03694	39.8113	11.3747	3.5	0	11.5245	0
31.3255	74.2617	208	Power Plant	Lahore	Pakistan	Five oil power plant near Lahore	0.4026	36.0253	4.02138	8.95844	11.9753	6.53691	1.83194	5.69198	7.6134	0.747627
31.2934	49.1215	33	Oil and Gas	Ahvaz	Iran	Oil wells in Khuzistan; Marun. Fit includes other sources. Ahvaz power plant 30 km north-west	0.56485	159.864	9.8148	16.2881	24.8072	7.09778	3.49506	42.6983	9.69255	4.40527
30.789	130.308	614	Volcano	Kikai	Japan		0.41756	308.471	19.0781	16.1689	366.565	28.6678	12.7867	336.659	29.2299	11.5176
30.4395	49.0827	3	Oil and Gas	Bandar Imam	Iran	Bandar Imam Petrochemical complexesand power plant? Other sources.	0.45199	88.0986	6.46123	13.6349	4.76423	9.9591	0.47838	89.4539	15.7993	5.66189
30.1726	70.9934	121	Power Plant	Kot Addu	Pakistan	Oil power plant. Oil refinery 3 km East and power plant 30 km North	0.47157	27.7779	3.38452	8.20733	29.0979	5.93468	4.90302	9.64942	6.10008	1.58185
30.155	50.425	250	Oil and Gas	Bidoo	Iran	Oil/gas flares near Bidoo	0.46827	82.7404	5.95873	13.8856	12.9376	8.40725	1.53886	0	12.7341	0
30.1232	31.2374	20	Power Plant	Cairo	Egypt	Shoubrah El-kheima power plant, Cairo West power plant 7 km North-West	0.49588	36.5698	3.76876	9.7034	63.3477	8.05406	7.86532	40.2569	7.13602	5.64137
29.9791	55.8571	2560	Smelter	Sarcheshmeh	Iran	Copper complex	1.10495	286.307	17.0109	16.8307	325.093	20.7378	15.6763	342.366	22.4565	15.2457
29.635	129.716	560	Volcano	Suwanose-jima	Japan	Volcano	0.47003	191.064	12.3362	15.488	249.949	19.5121	12.81	224.563	20.3426	11.0391
29.4803	-95.6318	22	Power Plant	Parish	USA	US Source #49, 55 kT in 2005.	0.30063	54.8838	7.92465	6.92571	39.8971	13.6212	2.92905	33.2665	16.0664	2.07056
29.3958	76.8783	238	Power Plant	Panipat	India	Panipat coal thermal power station, 1369 MW.	0.3883	38.6628	4.56723	8.46527	31.102	7.72455	4.02639	34.1242	8.82243	3.86789
29.365	47.7879	6	Power Plant	Al Doha	Kuwait	Doha East and West power plants. Also Sabya power plant 40 km East	0.62788	273.174	16.3391	16.719	269.072	18.091	14.8733	334.657	22.6254	14.7912
29.2364	61.6111	1000	Smelter	Saindakn	Pakistan	Saindak Smelter, Pakistan	0.86427	21.5882	2.14898	10.0458	15.3808	4.03438	3.81242	26.3919	4.69873	5.6168
29.2183	50.3188	26	Oil and Gas	Khark Island	Iran	Oil rigs. Kharg Island is Iran’s primary oil export terminal in the Persian Gulf.	0.3003	322.546	19.8756	16.2282	156.775	19.3876	8.08636	230.708	26.3477	8.75628
29.1825	74.0195	198	Power Plant	Suratgarh	India	Suratgarh Super Thermal Power Station	0.56485	13.2976	2.60963	5.0956	6.39574	4.76081	1.34341	12.2184	5.80959	2.10313
28.7059	48.3725	2	Power Plant	Az Zour South	Kuwait	Az Zour South (ZSPS) Thermal oil power plant	0.54461	97.7599	6.74556	14.4925	68.9024	9.88815	6.96818	95.1046	13.3978	7.09853
28.5983	77.6101	209	Power Plant	Dadri	India	NTPC-Dadri coal power plant	0.39479	42.5957	4.62612	9.20765	27.0252	7.71634	3.50234	7.55318	8.52974	0.885512
28.5	49.8	1	Oil and Gas	Fereidoon	Saudi Arabia	Oil Fields in Persian Gulf. A strong SO2 signal.	0.26026	360.222	22.3757	16.0988	300.847	25.7951	11.6629	352.758	33.8496	10.4213
28.4649	-100.681	307	Power Plant	Carbon	Mexico	Carbon I and II Coal power plants	0.3762	95.682	7.44207	12.8569	103.178	11.7868	8.75363	62.9992	10.1059	6.23392
28.1936	115.708	40	Power Plant	Fengcheng	China	Fengcheng coal power plant	0.36729	62.0896	6.52321	9.51826	49.1246	10.582	4.64226	56.2305	12.2706	4.58254
27.8585	113.106	65	Power Plant	Zhuzhou	China	Zhuzhou power plant, Xiangtan power plant 12 km north-west	0.47575	22.8821	4.78703	4.78002	9.58321	7.48206	1.28082	16.4897	8.30601	1.98527
27.6312	111.48	195	Power Plant	Jinzhushan	China	Jinzhushan coal power plant	0.53592	37.2177	4.67826	7.95545	16.7811	7.94032	2.1134	9.17885	9.32885	0.983921
27.5494	52.5611	53	Oil and Gas	Zagroz	Iran	Petrochemical complex	0.41547	694.644	41.3199	16.8114	509.65	36.7816	13.8561	384.49	35.9359	10.6993
27.25	140.874	38	Volcano	Nishinoshima	Japan		0.33	31.3478	5.69724	5.50227	0	10.0509	0	22.6302	12.5051	1.80968
27.1466	56.1161	8	Power Plant	Bandar Abbas	Iran	Bandar Abbas Thermal Oil power plant. zinc smelter in 3 km North-West	0.46915	124.866	8.06089	15.4903	29.6277	8.45974	3.50219	17.4343	10.8688	1.60406
27.0728	49.5676	4	Oil and Gas	Jubail	Saudi Arabia	Jubail Industrial City (Oil)	0.49302	137.465	9.10869	15.0917	161.4	14.6415	11.0235	112.907	17.403	6.48779
26.6	101.5	1150	Power Plant	Panzhihua	China	Power plants, smelters. The largest iron ore mine in China.	0.62733	35.5855	3.35578	10.6043	8.22128	5.25768	1.56367	10.2915	5.54673	1.85541
26.2027	44.0154	617	Power Plant	Buraydah	Saudi Arabia	Buraydah power plant	0.84392	16.085	1.91139	8.41534	7.02879	3.49198	2.01284	2.43532	3.89319	0.625534
25.913	81.327	117	Power Plant	Unchahar	India		0.41679	26.838	3.74035	7.17527	27.7812	7.77504	3.57313	17.0067	8.42227	2.01925
25.5882	-99.9378	322	Oil and Gas	Cadereyta	Mexico	Refineria Pemex Cadereyta	0.385	36.3555	5.15902	7.04698	38.7194	10.2364	3.78253	35.3351	8.63888	4.09024
25.4952	49.3735	287	Oil and Gas	Al Hofuf	Saudi Arabia	Unknown source near Al Hofuf	0.7755	40.7998	3.08664	13.2182	51.1653	5.92367	8.63743	33.9434	7.38007	4.59933
25.239	87.266	43	Power Plant	Kalalgaon	India		0.36498	44.2177	4.7861	9.23877	26.7642	9.32191	2.8711	33.7065	9.65276	3.4919
25.1875	49.3095	260	Power Plant	Uthmaniya	Saudi Arabia		0.79211	30.6542	2.60407	11.7716	39.5273	5.30011	7.45782	24.0019	6.7501	3.55578
25.1499	52.8767	1	Oil and Gas	Das Island	United Arab Emirates		0.27511	405.013	24.6699	16.4173	383.349	28.4467	13.476	484.797	38.5487	12.5762
25.1299	75.884	280	Power Plant	Kota	India	Kota Coal Thermal power plant, 1241 MW	0.52756	35.8326	3.5281	10.1563	45.4947	6.73348	6.75649	25.0637	6.49015	3.86181
25.0151	102.333	1841	Power Plant	Kunming	China	Huadian Kunming-II coal power plant or a different source nearby	0.79013	22.5478	3.30039	6.83187	31.3242	6.48583	4.82963	19.3623	6.97603	2.77555
24.9625	103.028	1800	Power Plant	Yangzonghai	China	Yangzonghai coal power plant. Could be influenced by Kunming power plants.	0.77759	18.3934	3.13751	5.86241	13.8412	6.74973	2.05063	33.8559	7.16677	4.72401
24.9624	74.6629	398	Smelter	Chanderia	India	Chanderia zinc and lead smelter, other sources in the area	0.53834	31.4271	3.40849	9.22024	44.7795	6.44862	6.94404	18.5955	6.56099	2.83426
24.906	66.6945	20	Power Plant	Karachi	Pakistan	Oil power plant and refinery near Karachi	0.32274	34.9676	4.97535	7.02818	31.7171	9.85523	3.2183	3.90209	9.90605	0.39391
24.8953	51.5454	3	Oil and Gas	Mesaieed	Qatar	Oil refinery, other sources near Mesaieed	0.49973	102.041	6.99023	14.5976	169.862	13.7468	12.3565	163.841	15.7713	10.3886
24.7817	67.3601	6	Power Plant	Bin Qasim	Pakistan	KESC Bin Qasim Thermal Power Station	0.35475	58.7008	5.24139	11.1995	69.0603	9.67552	7.13763	21.0559	9.38125	2.24446
24.7736	87.894	50	Power Plant	Farakka	India	Farakka Coal power plant	0.35937	86.6751	6.79521	12.7553	43.6139	9.20682	4.73713	43.8258	11.7698	3.72359
24.52	46.87	593	Oil and Gas	Riyad	Saudi Arabia	Saudi Aramco Riyadh Refinery, other sources near Ryad	0.84579	68.2292	4.38062	15.5752	48.5867	5.07751	9.56901	31.0527	5.23846	5.92784
24.09	82.68	279	Power Plant	Vindhyachal	India	Vindhyachal Super Thermal Power Station, Singrauli Super Thermal Power Station, and Rihand Thermal Power Station	0.47014	425.268	25.2545	16.8393	463.764	29.1984	15.8832	356.865	24.7237	14.4341
23.9471	38.3098	2	Oil and Gas	Yanbu	Saudi Arabia	Yanbu refinery, Marafiq Yanbu Water and power plant, other	0.38291	154.766	9.87903	15.6661	159.916	13.1461	12.1645	127.459	12.941	9.84926
23.8455	53.6457	68	Oil and Gas	Habshan	United Arab Emirates	Habshan oil field	0.484	102.162	6.71936	15.2041	17.8835	6.56172	2.72542	31.4284	9.48402	3.31383
23.8387	103.198	1246	Power Plant	Honghe	China	Multiple coal (lignite) power plants nearby	0.6061	26.942	4.07662	6.6089	35.573	8.72045	4.07927	16.1551	9.37029	1.72408
23.7375	86.127	208	Power Plant	Chandrapura	India	Chandrapura coal power plant, Bokaro coal power plant 25 kn West, other power plant in the area	0.42174	62.1518	5.11061	12.1613	55.824	9.37583	5.95403	28.1161	10.7487	2.61577
23.6639	68.784	62	Power Plant	Kutch	India	Kutch Lignite Thermal Power Station	0.40964	190.139	11.7256	16.2157	205.224	15.5971	13.1578	137.432	13.5636	10.1324
23.5775	87.2091	75	Power Plant	Durgapur	India		0.3916	127.251	8.35112	15.2376	87.1535	9.86274	8.83664	100.89	11.3379	8.89848
23.2445	72.6744	81	Power Plant	Gandhi Nagar	India	Gandhi Nagar coal power plant	0.42647	34.6894	3.83496	9.04557	36.4322	7.46039	4.88342	48.5587	8.92649	5.43985
23.1894	-106.356	12	Power Plant	Mazatlan	Mexico	Jose Aceves Pozos (Mazatlan II) Thermal power plant	0.21846	42.1311	6.24294	6.74859	34.0587	10.8784	3.13087	0	10.7307	0
23.0711	-81.5375	20	Power Plant	Guiteras	Cuba	Guiteras and Esta de la Habana power plants (Oil)	0.39622	117.31	8.14829	14.3969	142.28	11.8635	11.9931	101.712	10.3724	9.80602
23.0202	-82.7501	12	Power Plant	Mariel	Cuba	Maximo Gomez oil-burning electrical power plant	0.40502	53.4489	5.4592	9.7906	58.3783	10.0747	5.79453	58.9418	10.065	5.85609
22.8752	73.3618	79	Power Plant	Wanakbori	India	Wanakbori coal power plant	0.42889	36.9096	3.76256	9.80971	41.5617	7.60708	5.46356	17.3193	8.44081	2.05185
22.785	86.2	171	Power Plant	Tata	India	Tata Steel Plant	0.4224	63.6362	5.03633	12.6354	53.4367	9.62743	5.55046	36.6322	10.7546	3.40619
22.6661	39.0322	15	Power Plant	Rabigh	Saudi Arabia	Rabigh oil power plant	0.35772	437.48	26.1777	16.7119	533.205	35.514	15.014	412.994	31.3254	13.184
22.4148	87.8733	10	Power Plant	Kolaghat	India	Kolaghat Thermal Coal power plant, other sources in the area	0.36586	30.1178	4.6689	6.45074	36.3769	10.6134	3.42744	0	11.8247	0
22.3933	82.7425	297	Power Plant	Korba	India	Korba Super Thermal power plant, other sources	0.49203	263.515	15.8268	16.6499	276.041	18.8358	14.6551	246.43	20.0284	12.304
22.3333	69.7524	35	Oil and Gas	Essar	India	Essar Oil refinery, other sources	0.34012	182.004	11.6158	15.6686	184.295	15.8587	11.6211	145.352	16.092	9.03257
22.27	-97.81	8	Oil and Gas	Tampico	Mexico	Pemex Ciudad Madero Refinery, Altamira Oil power plant 25 km north-west	0.32461	21.969	5.15995	4.25761	49.2012	11.4664	4.29089	13.9205	14.079	0.988744
22.1117	78.1721	467	Power Plant	Satpura	India	Satpura thermal power station, 1143 MW	0.51733	17.6054	3.06516	5.74369	41.1882	6.68506	6.16123	14.3151	8.08895	1.76971
21.928	83.344	250	Power Plant	Raigarh Mill	India		0.48048	102.138	6.83433	14.9448	132.396	12.2736	10.787	153.343	16.5183	9.28324
21.785	84.0553	222	Power Plant	Sterlite	India	Other power plants and factories in the area	0.45716	249.478	15.0622	16.5632	270.537	18.6437	14.5109	230.607	18.5109	12.4579
21.5658	-77.2725	7	Power Plant	Nuevitas	Cuba		0.37136	82.1709	7.24439	11.3427	111.567	13.6625	8.16592	95.2453	13.4365	7.08856
21.4426	39.1806	6	Oil and Gas	Jeddah	Saudi Arabia	Jeddah refinery and power plant	0.39732	179.601	11.2928	15.9041	190.863	16.6705	11.4491	152.098	16.5954	9.16508
21.398	73.1074	41	Power Plant	Surat	India	Surat lignite power station	0.3927	62.6106	5.32651	11.7545	65.7131	9.14766	7.1836	81.0677	11.1603	7.26396
21.2478	79.1	302	Power Plant	Koradi	India	Koradi thermal power station, 1080 MW	0.48763	127.994	8.22956	15.553	130.253	10.3765	12.5527	100.275	12.4581	8.04903
21.1837	81.4231	302	Power Plant	Bhilai	India	Bhilai Expansion power plant	0.48609	24.6369	3.41271	7.21916	32.149	7.41178	4.33756	32.0505	10.5717	3.03172
21.165	72.661	5	Power Plant	Hazira	India	Hazira Gseg Powerplant, other sources	0.35222	60.9715	5.47551	11.1353	51.0126	9.92858	5.13796	59.4545	11.6192	5.11693
21.0955	85.0756	88	Power Plant	Talcher	India	Talcher Super thermal power station, 3000 MW	0.40458	251.824	15.3758	16.3779	276.484	19.8146	13.9535	225.9	19.7852	11.4176
21.0483	75.8459	213	Power Plant	Bhusawal	India	Bhusawal coal power station	0.4873	48.0402	4.17723	11.5005	41.7954	6.70104	6.23715	49.5191	8.1691	6.06176
21.016	-97.3333	2	Power Plant	Tuxpan	Mexico	Power plant and oil refinery neat Tuxpan	0.33418	120.563	8.84721	13.6272	71.954	11.6354	6.18404	96.7182	21.9091	4.41452
20.7147	76.7948	280	Power Plant	Paras	India	Paras Coal Power Station	0.49522	15.9798	3.0703	5.20463	12.9234	5.88497	2.19601	0	7.44856	0
20.6931	-75.5461	13	Smelter	Nicaro	Cuba	Nicaro Cuba nickel smelter. The secondary source is from Punta Gorda / Moa Bay smelter	0.36333	37.781	5.48449	6.8887	137.984	13.2598	10.4062	79.9065	10.5815	7.55155
20.6387	-74.8802	17	Smelter	Che Guevara	Cuba	Che Guevara nickel factory. Possible influence from Nicaro.	0.33671	35.467	6.02292	5.88866	72.0991	12.9806	5.55436	76.9351	12.6567	6.07858
20.6273	39.5564	1	Power Plant	Shaiba	Saudi Arabia	Shaiba Desalination and power plant, Oil refinery	0.43186	276.235	16.6541	16.5866	354.096	23.8574	14.8422	260.904	20.7143	12.5954
20.57	-101.17	1720	Power Plant	Salamanca	Mexico	Oil refinery and power plant near Salamanca	0.76879	23.0524	2.51934	9.15019	29.3427	5.74911	5.10387	16.7911	7.69661	2.18163
20.0521	-99.2804	2125	Oil and Gas	Tula	Mexico	Refinery, other sources	0.83248	162.462	10.1053	16.0768	138.275	12.2476	11.2899	112.775	14.6422	7.70206
20.0072	79.2893	194	Power Plant	Chandrapur	India	Chandrapur Super Thermal Power Station, 2340 MW	0.45936	170.833	10.5498	16.193	131.804	10.3606	12.7217	125.258	11.7296	10.6789
19.42	-155.29	1222	Volcano	Kilauea	USA	Large increase in emissions in 2008	0.59642	562.242	35.3428	15.9082	738.024	56.1632	13.1407	640.559	72.7265	8.80777
19.3976	-92.2408	1	Oil and Gas	Cantarell	Mexico	Oil fields in Gulf of Mexico	0.32274	452.2	27.3862	16.512	403.296	27.6675	14.5765	454.241	32.5421	13.9586
19.0832	-104.282	42	Power Plant	Manzanillo	Mexico	Manzanillo power plant and oil refinery	0.27731	39.6375	5.51425	7.1882	81.029	10.2171	7.9307	30.9831	10.5327	2.94163
19.023	-98.622	5100	Volcano	Popocatepetl	Mexico		1.42802	357.482	21.2209	16.8458	421.247	26.2791	16.0297	422.438	28.8583	14.6384
19.0033	72.897	3	Power Plant	Trombay	India		0.29766	61.8715	5.96006	10.381	42.4011	10.1794	4.16539	4.36439	10.666	0.409187
18.8681	76.5254	456	Power Plant	Parli	India	Parli power plant	0.5423	17.2206	2.89619	5.94594	5.59327	5.27115	1.06111	10.4337	6.08102	1.71579
18.7545	79.4597	160	Power Plant	Ramagundam	India	National Thermal Power Corporation, 2340MV	0.45551	158.31	9.8732	16.0343	123.414	9.62258	12.8254	119.258	11.0276	10.8145
18.296	99.7528	343	Power Plant	Mae Moh	Thailand	Mae Moh power plant	0.35475	27.9559	4.40113	6.35197	16.7243	7.03264	2.3781	27.7295	8.11308	3.41787
17.9832	-102.117	13	Power Plant	Petacalco	Mexico		0.19503	154.171	11.7893	13.0772	168.132	18.5292	9.07386	132.921	19.5918	6.78452
17.9781	-94.5295	16	Oil and Gas	Minatitlan	Mexico	Refinería General Lázaro Cárdenas del Río, other oil refineries in the area	0.33198	33.4734	6.006	5.57333	0	11.8312	0	3.99892	15.1091	0.26467
17.8936	-93.1863	22	Oil and Gas	Reforma	Mexico	Oil and gas factories near Reforma	0.33693	439.444	27.0183	16.2647	390.744	30.7163	12.7211	417.324	35.2253	11.8473
17.6216	80.6966	94	Power Plant	Kothagudem	India		0.39688	113.353	7.70671	14.7083	94.4505	9.43952	10.0059	55.5739	10.5935	5.24603
17.5952	83.0899	25	Power Plant	Simhadri	India		0.33385	173.951	11.4146	15.2393	176.517	15.1509	11.6506	96.2881	13.781	6.987
17.532	-90.786	60	Oil and Gas	Xan	Guatemala		0.30701	57.0491	6.40104	8.91247	78.3552	11.3604	6.89724	24.0929	11.7461	2.05114
16.72	-62.18	870	Volcano	Soufriere Hills	Montserrat (UK)		0.46486	101.921	7.3533	13.8606	61.4756	8.39471	7.32313	51.107	7.78216	6.5672
16.5996	80.5361	37	Power Plant	Vijayawada	India	Vijayawada power plant	0.3927	43.4682	5.27935	8.23362	39.1471	8.41931	4.64968	9.12223	9.31211	0.979609
16.3533	77.3441	364	Power Plant	Raichur	India		0.54956	46.4692	3.91966	11.8554	45.1696	6.13253	7.36558	38.4019	6.96609	5.51269
16.2061	-95.1776	9	Oil and Gas	Salina Cruz	Mexico	Salina Cruz Oil refinery	0.29843	117.307	8.77418	13.3696	135.47	13.3642	10.1367	61.4919	12.9122	4.76232
15.1839	76.6622	490	Power Plant	Torangallu	India	Torangallu (Jindal Steel) Works Coal Power Station	0.57013	66.2977	4.80353	13.8019	58.306	6.54018	8.91504	53.5342	7.73376	6.92214
14.7027	78.4577	178	Power Plant	Rayala Seema	India	Rayala Seema (RTpower plant) Coal Power Station	0.49324	47.1475	4.15256	11.3538	36.7092	6.21021	5.9111	6.53851	7.09285	0.921845
14.5197	120.47	1388	Volcano	Mariveles	Philippines		0.56804	51.7736	4.86367	10.6449	32.2329	6.68528	4.82148	25.8146	6.70429	3.85047
14.473	-90.88	3763	Volcano	Fuego	Guatemala	Fuego volcano plus Santa Maria volcano	1.07327	140.794	8.66068	16.2567	231.152	15.3928	15.0169	155.771	19.9965	7.7899
13.6	40.67	613	Volcano	Erta Ale	Ethiopia	Erte Ale volcano,possibly other volcanic sources	0.6721	129.672	8.04051	16.1274	171.529	12.3592	13.8786	124.044	10.9927	11.2843
13.257	123.685	2462	Volcano	Mayon	Philippines	Mayon, the Philippines' most active volcano	0.80157	372.319	22.2519	16.7321	386.766	24.7417	15.6321	331.252	22.7105	14.5858
13.25	80.33	8	Power Plant	North Chennai	India	North Chennai Thermal Power Station	0.3828	180.379	11.674	15.4513	159.599	12.7153	12.5517	130.914	14.5856	8.97558
13.1596	74.8002	34	Power Plant	Lanco Udupi	India	Lanco Udupi Coal Mega power plant	0.34705	57.6335	5.30661	10.8607	30.579	7.9789	3.83249	29.9493	9.61999	3.11323
12.7682	124.053	1500	Volcano	Bulusan	Philippines	Bulusan Volcano	0.58905	67.846	5.98776	11.3308	91.6387	12.3466	7.42216	150.729	15.66	9.62508
12.702	-87.004	1745	Volcano	San Cristobal	Nicaragua	San Cristobal volcano	0.62205	141.219	9.22253	15.3124	163.96	12.7836	12.8258	114.152	13.1168	8.70272
11.984	-86.161	635	Volcano	Masaya	Nicaragua	Masaya Volcano	0.43813	398.143	24.3175	16.3727	372.932	25.2497	14.7698	306.3	25.5196	12.0025
11.7721	77.8149	223	Power Plant	Mettur	India	Mettur Thermal Power Station, 840 MW	0.42922	58.6109	5.04433	11.6192	54.6517	8.10768	6.74073	20.3186	8.64228	2.35107
11.75	-70.2	21	Oil and Gas	Paraguana	Venezuela	Paraguana Refinery Complex, Venezuela, one of the world largest refinery complexes (940,000 bpd)	0.32197	63.687	8.47755	7.51243	63.042	15.3087	4.11805	48.6189	13.8702	3.50529
11.5549	79.4439	44	Power Plant	Neyveli	India	Neyveli Lignite Termal power plants, 2740 MW (sum of three)	0.38742	299.125	18.2489	16.3914	343.144	22.1881	15.4652	273.712	20.5663	13.3087
10.463	-84.703	1670	Volcano	Arenal	Costa Rica		0.77	59.7606	5.33288	11.2061	95.5363	13.5814	7.03433	34.2103	15.9139	2.14971
10.412	123.132	2435	Volcano	Kanlaon	Philippines	Kanlaon	0.78309	180.009	11.5638	15.5666	159.574	16.3517	9.75885	158.223	20.7923	7.6097
10.0761	-64.8749	10	Oil and Gas	Jose	Venezuela	Heavy oil refineries at Jose and Punta Araya	0.39655	146.371	10.7862	13.5702	163.3	14.6808	11.1234	123.62	15.7759	7.83601
10.025	-83.767	3340	Volcano	Turrialba	Costa Rica	Turrialba and Poas volcanos	1.00243	358.248	22.132	16.1869	351.455	30.9037	11.3726	317.846	46.7075	6.80502
8.76306	78.1715	5	Power Plant	Tuticorin	India	Tuticorin power plant	0.36432	60.7169	5.62815	10.7881	82.3084	9.92606	8.29216	83.3087	12.6781	6.57107
4.895	-75.322	5321	Volcano	Nevado del Ruiz	Colombia	Nevado del Ruiz volacno	1.40954	487.825	29.9275	16.3002	246.97	20.7735	11.8887	358.517	56.9751	6.29251
3.16964	98.3921	2460	Volcano	Sinabung	Indonesia		0.80806	98.4625	6.91251	14.2441	82.0802	10.2554	8.00358	72.3154	14.398	5.0226
2.93	-76.03	5364	Volcano	Nevado del Huila	Colombia		1.40217	36.6633	3.62993	10.1003	18.8178	6.00825	3.132	6.05855	16.2908	0.371901
2.78	125.4	1780	Volcano	Karangetang	Indonesia		0.69311	180.957	10.9973	16.4547	177.088	11.8901	14.8938	148.008	11.8641	12.4753
1.68	127.88	1170	Volcano	Dukono	Indonesia	Dukono, one of Indonesia's most active volcanoes.	0.52239	738.427	43.9747	16.7921	692.911	43.7998	15.82	746.254	50.2853	14.8404
1.28	103.71	21	Oil and Gas	Singapore	Singapore	Singapore Refining Corporation Refinery, 285000 bbl/day; other sources?	0.35992	63.4088	6.50183	9.75245	129.554	13.2626	9.76835	69.1765	13.9083	4.97377
-0.077	-77.656	3562	Volcano	Reventador	Ecuador	Possible interference from other volcanic sources	1.07327	88.8483	7.21165	12.3201	70.5215	9.21992	7.64882	89.6298	32.1188	2.79057
-0.83	-91.17	1124	Volcano	Sierra Negra	Ecuador		0.55	98.7793	7.80482	12.6562	102.956	11.4119	9.02183	109.971	23.5701	4.66571
-1.408	29.2	2950	Volcano	Nyamuragira	Democratic Republic of Congo	Africa's most active volcano	1.01871	344.275	20.6031	16.7099	213.565	15.0261	14.213	341.656	26.1534	13.0636
-1.697	101.264	3760	Volcano	Kerinci	Indonesia	Gunung Kerinci one of the most active in Sumatra	1.09527	128.006	8.19107	15.6275	108.741	8.9486	12.1517	132.898	14.4936	9.16944
-2.56982	121.379	611	Smelter	Soroako	Indonesia	Soroako nickel cmelter	0.38588	55.0662	5.72758	9.61423	50.0665	8.36043	5.98851	55.1689	11.9007	4.63577
-4.08	145.037	1730	Volcano	Manam	Papua New Guinea		0.64273	265.643	16.0942	16.5055	363.794	24.9161	14.6008	314.798	22.7457	13.8399
-5.05	151.33	2300	Volcano	Ulawun	Papua New Guinea		0.79684	118.381	7.69702	15.3801	132.293	11.014	12.0114	143.436	12.9393	11.0853
-5.525	148.42	991	Volcano	Langila	Papua New Guinea		0.50325	201.265	12.8126	15.7084	107.18	10.3888	10.3169	102.223	14.0208	7.29083
-5.88815	106.03	31	Power Plant	Suralaya	Indonesia	Suralaya Coal power plant, 3400 MW, other power plant and petrochemical factories in the area	0.36839	121.114	8.54848	14.1679	143.446	12.4611	11.5115	178.472	22.3434	7.98766
-6.10609	105.424	813	Volcano	Krakatau	Indonesia		0.46057	146.847	9.80927	14.9702	161.337	14.7716	10.9221	172.47	22.0455	7.82338
-6.14	155.195	1750	Volcano	Bagana	Papua New Guinea	Bagana one of Melanesia's youngest and most active volcanoes	0.54659	498.896	29.9613	16.6513	578.703	36.852	15.7035	528.852	39.5587	13.3688
-7.242	109.208	3329	Volcano	Slamet	Indonesia	Slamet, Java's one of its most active volcanos	1.01035	62.9697	4.39197	14.3374	64.9877	7.32251	8.87505	43.9199	9.49708	4.62457
-7.942	112.95	2258	Volcano	Tengger Caldera	Indonesia	Multiple volcanos at East Java	0.7612	288.74	17.4074	16.5872	278.275	18.2137	15.2783	287.853	21.4253	13.4352
-8.058	114.242	2799	Volcano	Ijen	Indonesia	Ijen volcano	0.87406	107.323	6.87092	15.6199	101.324	7.92755	12.7812	85.3026	9.54754	8.93451
-8.20851	119.066	1949	Volcano	Sangeang Api	Indonesia		0.68959	29.1133	2.92399	9.9567	23.3854	3.60586	6.48538	10.0269	4.09166	2.45057
-8.272	123.505	1339	Volcano	Lewotolo	Indonesia	A volcano at Lomblen Island, other volcanos in the area. Batu Tara volcano also contributes to the signal	0.56375	78.1731	5.63878	13.8635	75.6185	7.18455	10.5252	72.6721	8.29935	8.75636
-8.509	124.127	862	Volcano	Sirung	Indonesia		0.4389	269.849	16.3802	16.4741	149.691	10.6798	14.0163	171.534	12.7851	13.4167
-8.82	121.18	2124	Volcano	Ebulobo	Indonesia		0.7359	43.5164	3.70561	11.7434	22.6009	3.91589	5.77158	23.9244	5.00296	4.78205
-10.38	165.8	851	Volcano	Tinakula	Santa Cruz Islands	Tinakula	0.51579	69.0048	6.07586	11.3572	42.7465	8.88448	4.81136	46.0994	13.3197	3.46099
-12.5344	28.2359	1276	Smelter	Copperbelt	Zambia	Smelters in the Copperbelt region	0.60764	39.3631	4.00557	9.82709	12.3463	5.37077	2.2988	14.2399	5.29428	2.68969
-14.27	167.5	797	Volcano	Gaua	Vanuatu	Gaua volcano	0.50072	90.1091	7.87969	11.4356	27.6157	18.6485	1.48085	31.076	22.3523	1.39028
-15.4	167.83	1395	Volcano	Aoba	Vanuatu	Estimates are influenced by Ambym volcano	0.62084	745.412	45.1667	16.5036	693.814	51.2762	13.5309	847.194	74.5286	11.3674
-15.7952	-71.8597	5967	Volcano	Sabancaya	Peru		1.81357	335.064	20.2019	16.5857	329.982	22.956	14.3746	407.321	35.4458	11.4914
-16.25	168.12	1334	Volcano	Ambrym	Vanuatu	Ambrym, one of the most active volcanoes of the New Hebrides arc.	0.60522	1458.43	86.7013	16.8213	1790.01	112.088	15.9696	2115.33	142.422	14.8525
-18.3846	26.4713	781	Power Plant	Hwange	Zimbabwe	Hwange power plant	0.61611	56.272	4.08836	13.764	38.0059	4.92212	7.72146	28.8129	5.50024	5.23848
-19.15	-68.83	5550	Volcano	Isluga	Chile		1.81632	25.3927	1.99315	12.7399	6.91424	6.88204	1.00468	0	14.885	0
-19.53	169.442	280	Volcano	Yasur	Vanuatu		0.43857	654.735	39.3237	16.6499	601.737	39.5793	15.2034	626.408	45.2012	13.8582
-19.75	-175.07	515	Volcano	Tofua	Tonga Islands		0.47476	26.3885	4.91496	5.36901	14.8493	8.27147	1.79524	0	13.3064	0
-20.7287	139.481	373	Smelter	Mt Isa	Australia	One of the most productive single mines in world history, based on combined production of lead, silver, copper and zinc	0.52481	246.446	15.0422	16.3837	223.417	15.1461	14.7507	184.851	14.4268	12.813
-21.231	55.713	2460	Volcano	Reunuin	Reunion Island, France	Piton de la Fournaise, one of the world's most active volcanoes	0.86053	166.669	10.6979	15.5796	211.453	17.6841	11.9572	177.409	22.1469	8.01055
-23.5097	150.32	67	Power Plant	Stanwell	Australia		0.38456	19.2972	5.08759	3.79299	19.5065	8.39117	2.32465	20.5435	10.9061	1.88367
-23.7053	27.5638	905	Power Plant	Matimba	South Africa	Coal power plant, ~4000 MW	0.63206	330.958	19.7373	16.7682	354.659	21.912	16.1856	291.06	19.7993	14.7005
-23.9851	31.159	412	Smelter	Palabora	South Africa	Palabora, a large copper mine, smelter and refinery complex managed by Palabora Mining Company in the Limpopo Province of South Africa	0.4455	49.5168	4.88517	10.1362	51.9329	8.67986	5.98316	63.165	14.185	4.45293
-25.17	-68.5	5697	Volcano	Lastarria	Argentina	Lastarria volcano	1.80015	46.3189	3.29772	14.0457	73.6091	8.66173	8.4982	59.6228	13.7632	4.33205
-26.25	29.18	1603	Power Plant	Kriel	South Africa	Multiple sources including Duvha Power Station (3600 MW), Kendal Power Station (4000 MW), Kriel Power Station (3000MW), etc. Total 10 power plants with production >1000 MW each	0.75207	581.601	34.3962	16.9089	535.554	32.6857	16.385	539.778	34.7335	15.5406
-26.7442	27.9754	1461	Power Plant	Lethabo	South Africa	The total capacity of 3,708MW. Construction of Lethabo started in 1980 and by December 1990, the station was fully operational.	0.75548	207.752	12.6181	16.4645	193.552	13.3522	14.4959	177.75	14.9313	11.9045
-27.1009	29.7701	1761	Power Plant	Majuba	South Africa	Majuba coal power plant. The estimates may be affected by Kriel site.	0.75207	194.09	11.9501	16.2417	173.763	13.232	13.132	246.715	19.782	12.4717
-32.3939	150.949	178	Power Plant	Bayswater	Australia	Bayswater Power Station near Muswellbrook	0.33825	78.938	7.17355	11.004	89.3912	10.8543	8.23559	56.6975	10.0939	5.61698
-33.0622	151.522	36	Power Plant	Eraring	Australia		0.31427	63.9607	7.64623	8.36499	84.4947	12.4207	6.80273	42.8197	12.2701	3.48975
-33.1701	138.01	7	Smelter	Port Pirie	Australia	Port Pirie Smelter	0.37257	35.8521	5.52731	6.48636	4.59735	10.1351	0.453608	45.9136	10.5645	4.34602
-33.3999	150.082	879	Power Plant	Wallerawing	Australia	Walleraving and Mt. Piper coal power plants 7 km apart	0.42768	29.6147	5.60152	5.2869	14.4311	9.77364	1.47654	7.28225	8.42875	0.863978
-33.4463	116.307	282	Power Plant	Muja	Australia		0.36058	24.5687	5.3548	4.58816	40.6999	12.0002	3.39159	40.2497	12.0378	3.3436
-37.5202	177.181	321	Volcano	White Island	New Zealand	White Island Volcano	0.31801	267.596	17.5104	15.2821	192.367	19.4853	9.87244	148.454	19.9	7.45999
-37.8559	-71.1603	2800	Volcano	Copahue	Argentina		0.88352	138.846	8.87453	15.6454	149.519	24.0489	6.21731	138.021	26.3436	5.23928
-38.2533	146.575	130	Power Plant	Loy Yang	Australia	Loy Yang A Coal power plant Australia	0.25894	120.317	10.7726	11.1688	105.448	18.3995	5.73099	106.021	20.4892	5.17448
-39.42	-71.93	2847	Volcano	Villarrica	Chile	Villarrica volcano	0.85624	64.7766	5.236	12.3714	62.2469	11.7163	5.31284	74.3591	19.0696	3.89935
-57.7999	-26.4884	990	Volcano	Michael	South Sandwich Isl. (UK)	Michael	1.24861	53.772	5.09684	10.5501	75.0906	10.798	6.95409	98.1907	16.0648	6.11217
-77.5277	167.167	3794	Volcano	Erebus	Antarctica	Erebus Volcano, Antarctica	1.86505	19.1281	1.80756	10.5823	13.654	2.71018	5.03804	12.6961	2.41337	5.26074
