# Supplementary material for: Anthropogenic and volcanic point source SO 2 emissions derived from TROPOMI on board Sentinel-5 Precursor: first results
Source: Copernicus journal article supplement (doi:10.5194/acp-20-5591-2020), 2020-05-13
Supplement: Supplementary file [file acp-20-5591-2020-supplement-title-page.pdf › acp-20-5591-2020-supplement-title-page.pdf]

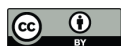

*Supplement of*

## **Anthropogenic and volcanic point source SO<sub>2</sub> emissions derived from TROPOMI on board Sentinel-5 Precursor: first results**

**Vitali Fioletov et al.**

*Correspondence to:* Vitali Fioletov ([vitali.fioletov@outlook.com](mailto:vitali.fioletov@outlook.com), [vitali.fioletov@canada.ca](mailto:vitali.fioletov@canada.ca))

- [acp-20-5591-2020-supplement-title-page.pdf](#)
- [Tropomi\\_Catalogue\\_Paper\\_Supplement.xls](#)

The copyright of individual parts of the supplement might differ from the CC BY 4.0 License.
